# Supplementary material
Source: publisher site journal article supplement (https://www.dovepress.com/article/355540)
Supplement: Supplementary file 1 [file get_supplementary_file.php]

Supplementary Table 1. Association of excess BMI and PNPLA3 p.I148M with hepatic steatosis diagnosed by ultrasound at baseline

|  | Hepatic steatosis | | | | |
| --- | --- | --- | --- | --- | --- |
|  | Yes | | No | | p-value |
|  | No. | (%) | No. | (%) |  |
| BMI (kg/m2)a |  |  |  |  | <0.0001 |
| Normal weight/underweight (<23) | 260 | (27.9) | 672 | (72.1) |  |
| Overweight (23-24.9) | 368 | (50.5) | 361 | (49.5) |  |
| Obesity (≥25) | 464 | (64.1) | 260 | (35.9) |  |
| PNPLA3b |  |  |  |  | <0.0001 |
| II | 393 | (41.8) | 547 | (58.2) |  |
| MI | 510 | (46.2) | 593 | (53.8) |  |
| MM | 188 | (55.8) | 149 | (44.2) |  |

Note: 5 participants with missing data on PNPLA3 genotype due to lack of DNA samples or PCR failure.

aCochran-Armitage test for trend: p<0.0001.

bCochran-Armitage test for trend: p<0.0001.
